# Supplementary material
Source: MDPI journal article supplement (https://www.mdpi.com/1996-1073/13/11/2699)

**Picture 1.** Workflow of the processes for the GIS analysis

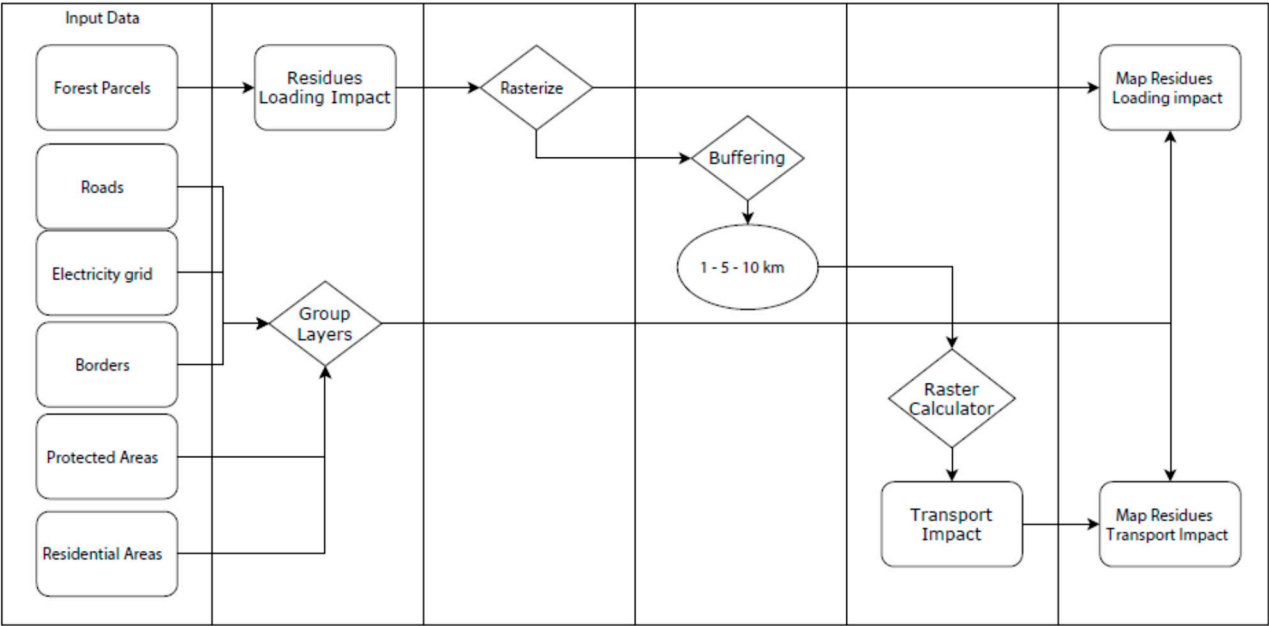

Supplement: s1 [file s1]
